# Supplementary material for: Improvement of neuronal differentiation by carbon monoxide: Role of pentose phosphate pathway
Source: PubMed Central journal article supplement — Redox Biol. 2018 May 15;17:338–47. doi: 10.1016/j.redox.2018.05.004 (PMC6007049; doi:10.1016/j.redox.2018.05.004), 2018-05-15
Supplement: mmc1.pdf [file mmc1.pdf]

## Supplementary Material

Figure S1

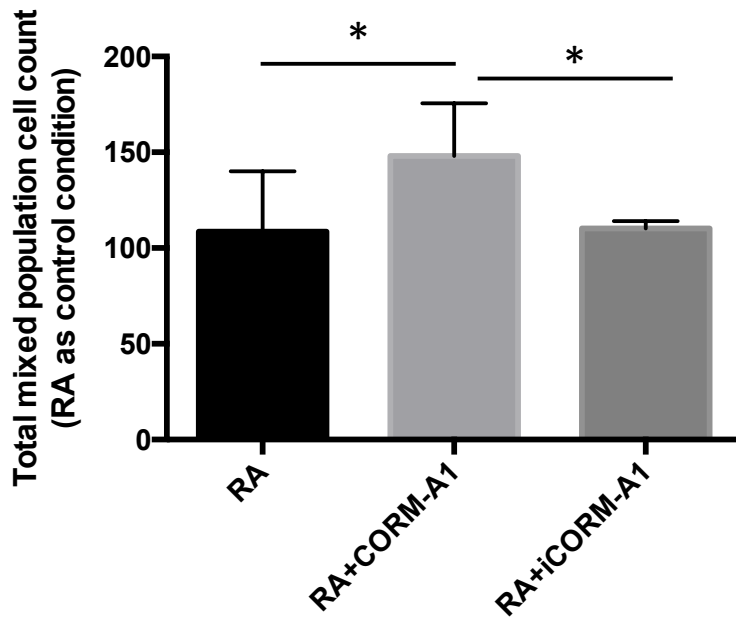

**Figure S1: iCORM-A1 does not improve neuronal differentiation yield.** Nuclei count *per* volume of SH-SY5Y cells and normalized by control cells treated with RA, following 7 days of differentiation.  $p < 0.05$ .

Figure S2

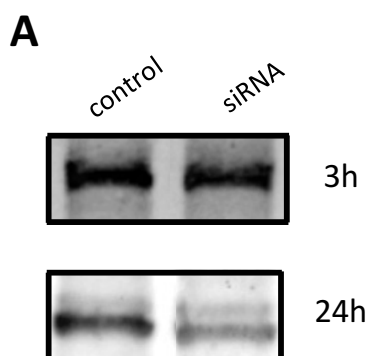

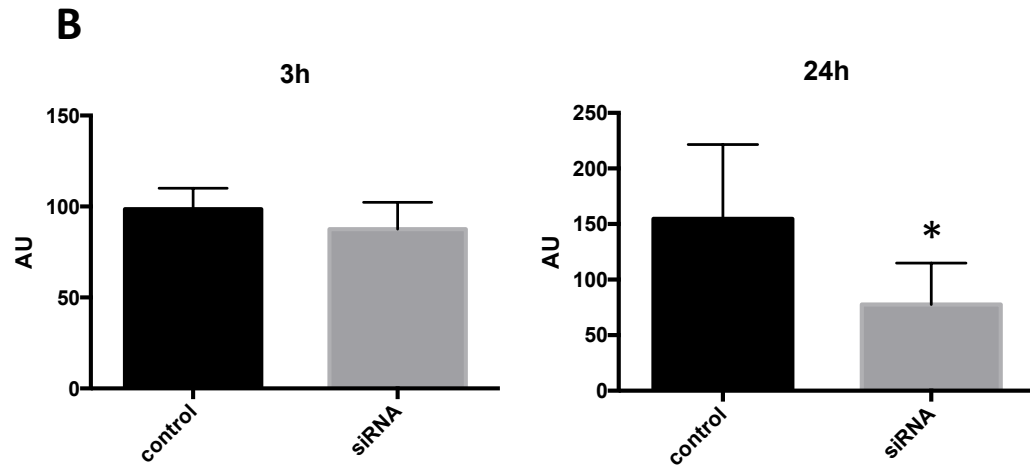

**Figure S2: Quantification of G6PD protein expression following siRNA silencing approach.** Protein quantification was assessed at 3 hours and 24 hours of neuronal differentiation, which corresponds to 27 hours and 48 hours of siRNA silencing, respectively. (A) Representative western blot membrane for each time point; (B) western blot band quantification. \* p-value<0.05.
